# Supplementary material
Source: PubMed Central journal article supplement (PMC7461722)

**A****Skin wound**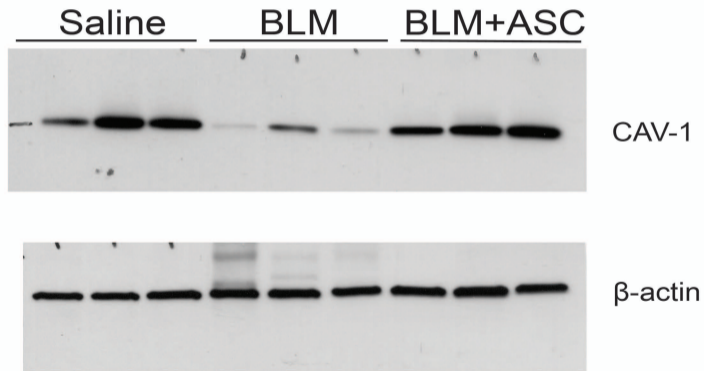**B****Lung**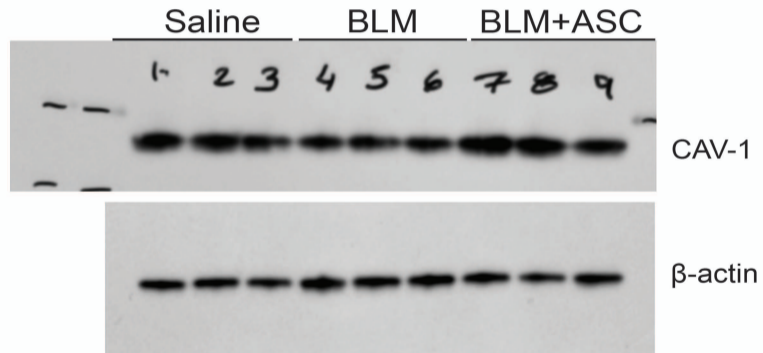

Supplement: NIHMS999511-supplement-Supplement.pdf [file NIHMS999511-supplement-Supplement.pdf]

**A****Skin wound**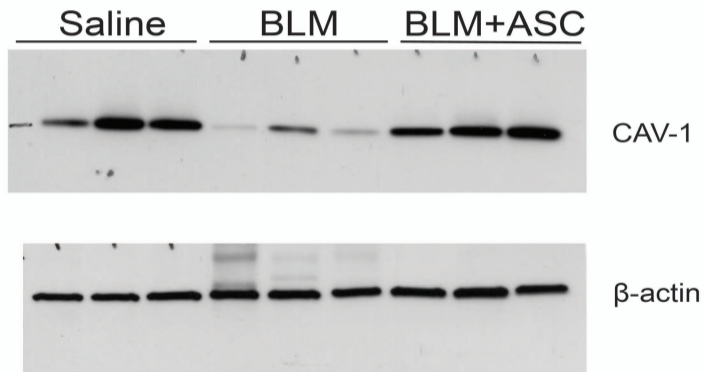**B****Lung**

**A****Skin Wound**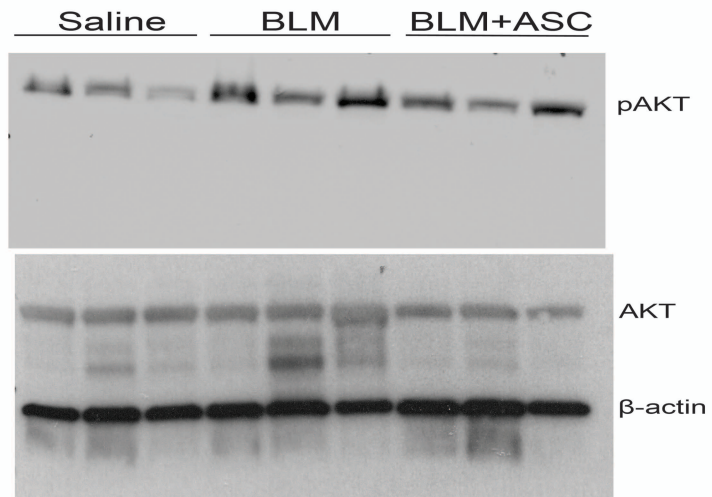**B****Lung**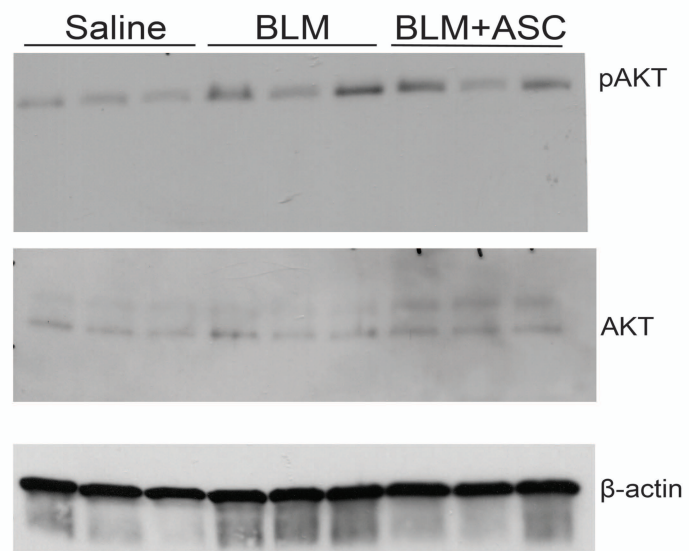

Supplement: NIHMS999511-supplement-supplement_files.pdf [file NIHMS999511-supplement-supplement_files.pdf]
